# Supplementary material
Source: PubMed Central journal article supplement (PMC3402087)

**A**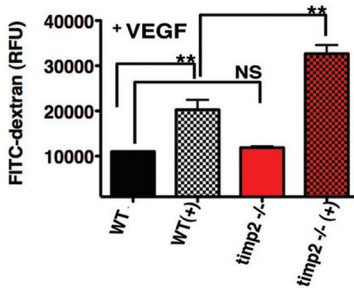**B**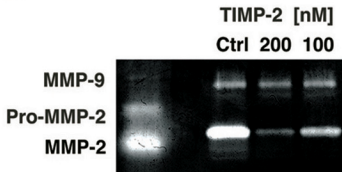**C**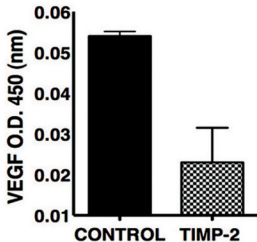

Supplement: NIHMS389651-supplement-2.pdf [file NIHMS389651-supplement-2.pdf]

**A**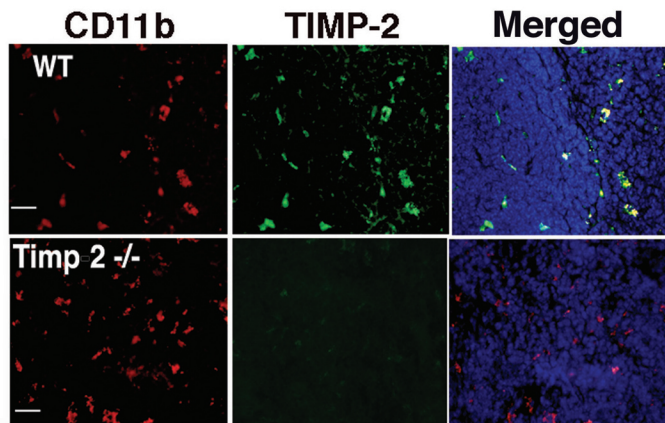**C**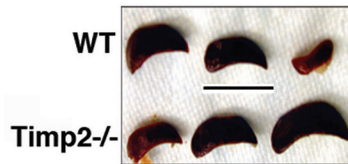**B**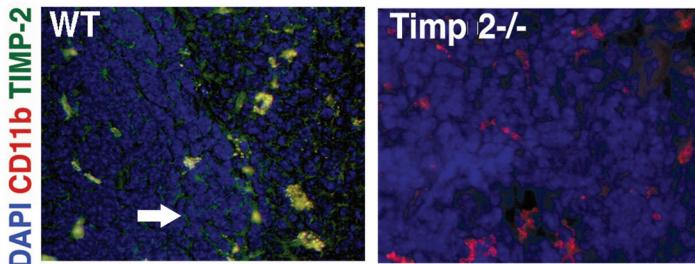**D**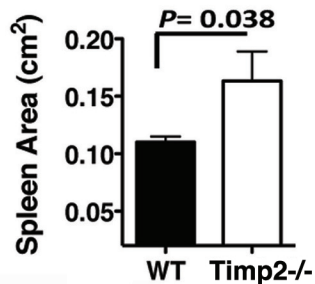

Supplement: NIHMS389651-supplement-3.pdf [file NIHMS389651-supplement-3.pdf]

**A**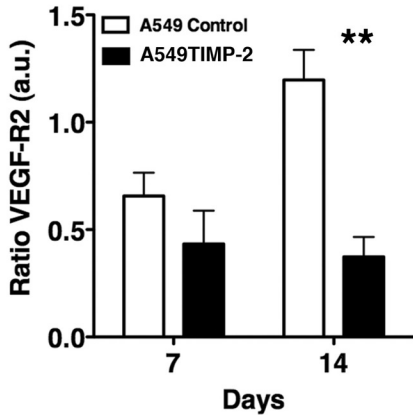**B**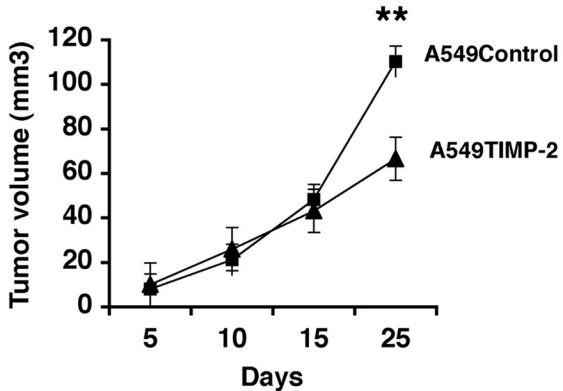

Supplement: NIHMS389651-supplement-4.pdf [file NIHMS389651-supplement-4.pdf]
